# Supplementary material for: Molecular Characterization of Circulating Plasma Cells in Patients with Active Systemic Lupus Erythematosus
Source: PLoS One. 2012 Sep 21;7(9):e44362. doi: 10.1371/journal.pone.0044362 (PMC3448624; doi:10.1371/journal.pone.0044362)
Supplement: Table S2 — List of genes in the order they appear in Figure 2 Heatmap. The column heading Log 2 difference is the difference in gene expression between SLE plasma cells and SLE naive and memory B cells. Fold change represents the fold change for the log 2 difference calculated. Yellow highlighted genes represent the probe sets and corresponding genes that appear more than once as differentially expressed genes. Black font represents genes upregulated in SLE plasma cells compared to SLE naive and memory B cells and red font are genes that are differentially downregulated in SLE plasma cells compared to SLE naive and memory B cells. (XLSX) [file pone.0044362.s002.xlsx]

## Sheet: Final supplement Table 2
		LOG 2 difference
UNIQID	NAME	Difference	Fold Change
218051_s_at	NT5DC2	5.36769	41.2892
206641_at	TNFRSF17	5.28462	38.9789
39248_at	AQP3	5.25709	38.2421
221286_s_at	PACAP	5.18123	36.2833
219118_at	FKBP11	4.93603	30.6122
212097_at	CAV1	4.88787	29.6071
201890_at	RRM2	4.78888	27.6438
203913_s_at	HPGD	4.74453	26.8069
214446_at	ELL2	4.71578	26.2779
216846_at	IGLV2-18 /// IGLV3-19 /// LOC100290481	4.52022	22.9468
219918_s_at	ASPM	4.47671	22.265
203675_at	NUCB2	4.47481	22.2357
217217_at	IGHA1 /// IGHA2 /// IGHG1 /// IGHG4 /// IGHM /// IGHV4-31	4.4491	21.843
200616_s_at	MLEC	4.42044	21.4133
219229_at	SLC21A11	4.37892	20.8058
219117_s_at	FKBP11	4.34769	20.3603
212338_at	MYO1D	4.27298	19.3328
210512_s_at	VEGF	4.26922	19.2825
204254_s_at	VDR	4.25268	19.0627
205692_s_at	CD38	4.24509	18.9627
206589_at	GFI1	4.23736	18.8613
202870_s_at	CDC20	4.23403	18.8179
217320_at		4.22078	18.6459
211639_x_at	IGHM	4.20842	18.4867
216560_x_at	IGL@	4.20028	18.3827
218618_s_at	FAD104	4.10024	17.1512
214973_x_at	IGHD	4.05924	16.6707
201206_s_at	RRBP1	4.05625	16.6361
200983_x_at	CD59	4.05097	16.5754
208499_s_at	DNAJC3	4.04044	16.4548
217231_s_at	MAST1	3.98582	15.8435
205780_at	BIK	3.98187	15.8002
202083_s_at	SEC14L1	3.97619	15.7381
216491_x_at	IGHM	3.96446	15.6107
215035_at	IGL@	3.89493	14.8761
203167_at	TIMP2	3.8482	14.402
217084_at	IGHM	3.79945	13.9235
209540_at	IGF1	3.75668	13.5167
211641_x_at	IGHM	3.71753	13.1549
208116_s_at	MAN1A1	3.69356	12.9381
209921_at	SLC7A11	3.62963	12.3773
206369_s_at	PIK3CG	3.62292	12.3199
219003_s_at	MANEA	3.60008	12.1264
216449_x_at	HSP90B1	3.59233	12.0614
211835_at	IGKV1-5	3.58982	12.0405
211878_at	IGHG3	3.58495	11.9999
215209_at	SEC24D	3.57197	11.8924
212592_at	IGJ	3.56794	11.8593
200670_at	XBP1	3.56643	11.8468
217281_x_at	IGHG3	3.53749	11.6116
219159_s_at	CRACC	3.52162	11.4845
209605_at	TST	3.48066	11.1631
211633_x_at	ICAP-1A	3.4462	10.8996
210258_at	RGS13	3.44022	10.8545
216365_x_at	IGLV3-19	3.42425	10.735
215554_at	GPLD1	3.41959	10.7004
210041_s_at	PGM3	3.40882	10.6208
201204_s_at	RRBP1	3.40539	10.5956
209642_at	BUB1	3.40353	10.5819
211637_x_at	IGHM	3.39542	10.5226
217192_s_at	PRDM1	3.38489	10.4461
203065_s_at	CAV1	3.38051	10.4144
216557_x_at	IGHA1 /// IGHD /// IGHG1 /// IGHG3 /// IGHM /// IGHV3-48 /// IGHV4-31 /// LOC100291917	3.3776	10.3934
221004_s_at	ITM2C	3.36854	10.3284
216853_x_at	IGLJ3	3.36417	10.2971
209031_at	IGSF4	3.32165	9.9981
200951_s_at	CCND2	3.29771	9.83355
221606_s_at	NSBP1	3.28568	9.75186
201286_at	SDC1	3.27962	9.71099
216510_x_at	IGHA1 /// IGHG1 /// IGHM /// IGHV3-23 /// IGHV4-31	3.27601	9.68671
202177_at	GAS6	3.26292	9.59921
203391_at	FKBP2	3.25166	9.52459
200598_s_at	TRA1	3.24322	9.46906
202655_at	ARMET	3.23654	9.42533
209773_s_at	RRM2	3.22451	9.34707
212022_s_at	MKI67	3.21569	9.29005
212902_at	SEC24A	3.21123	9.2614
221253_s_at	MUTED /// TXNDC5	3.20629	9.22974
216412_x_at	IGL@	3.19459	9.15519
203560_at	GGH	3.18506	9.0949
207865_s_at	BMP8	3.18496	9.09431
209357_at	CITED2	3.18371	9.08643
216829_at	IGKC	3.17962	9.06071
211549_s_at	HPGD	3.17281	9.01799
218663_at	HCAP-G	3.15427	8.90285
212698_s_at	SEPT10	3.15095	8.8824
211650_x_at	IGHM	3.14744	8.86084
207980_s_at	CITED2	3.14528	8.84758
212196_at	IL6ST	3.14193	8.82706
210721_s_at	PAK7	3.11811	8.68251
211868_x_at	IGHA1 /// IGHA2 /// IGHD /// IGHG1 /// IGHG2 /// IGHG3 /// IGHM /// IGHV3-48 /// IGHV4-31 /// LOC100126583 /// LOC100291917	3.10625	8.61143
211642_at	IGHG1 /// ZCWPW2	3.10528	8.6056
219541_at	LIME1	3.10019	8.57531
218436_at	SIL1	3.10008	8.57464
211634_x_at	IGHG3	3.09395	8.53828
217179_x_at	IGL@	3.08076	8.46058
215777_at	IGLV4-60	3.07523	8.42822
211527_x_at	VEGF	3.07407	8.42147
216542_x_at	IGHA1 /// IGHG1 /// IGHM	3.07352	8.41827
208949_s_at	LGALS3	3.06042	8.34214
201923_at	PRDX4	3.06014	8.34052
202027_at	C22orf5	3.05344	8.30186
203827_at	WIPI1	3.0508	8.28672
201195_s_at	SLC7A5	3.03092	8.17328
208547_at	HIST1H2BB	3.0222	8.12406
217227_x_at	IGL@	3.01898	8.10594
202336_s_at	PAM	3.00832	8.04628
216892_at	IGHG1	3.00354	8.01966
205046_at	CENPE	3.00174	8.00963
217157_x_at	IGK@ /// IGKC	2.98309	7.90678
217378_x_at		2.96482	7.8073
216430_x_at	IGL@	2.96352	7.80024
221441_at	GSCL	2.96199	7.79199
214777_at	IGKC	2.96141	7.78886
218254_s_at	SAR1B	2.95506	7.75466
215509_s_at	BUB1	2.93295	7.63669
216705_s_at	ADA	2.93086	7.62563
202241_at	C8FW	2.92616	7.60083
217600_at	CEGF3	2.92568	7.59833
221760_at	MAN1A1	2.92408	7.58992
203857_s_at	PDIR	2.9239	7.58896
214889_at	FAM149A	2.92137	7.57567
211908_x_at	IGHM	2.91695	7.55248
202375_at	SEC24D	2.91289	7.53124
207965_at	NEUROG3	2.91111	7.52197
218755_at	KIF20A	2.90838	7.50774
209340_at	UAP1	2.90135	7.47123
217145_at	IGK@ /// IGKC /// LOC652694	2.89184	7.42216
219529_at	CLIC3	2.88924	7.40883
215442_s_at	TSHR	2.88797	7.40228
204724_s_at	COL9A3	2.87754	7.34895
211798_x_at	IGLJ3	2.86881	7.30465
218681_s_at	SDF2L1	2.86557	7.28824
200999_s_at	CKAP4	2.86489	7.2848
211648_at	IGHG1 /// IGHM /// LOC100133862	2.85969	7.25858
211548_s_at	HPGD	2.85714	7.24576
200599_s_at	TRA1	2.8551	7.23552
215949_x_at	IGHM	2.8475	7.1975
211635_x_at	IGHG3	2.84604	7.19022
208190_s_at	LISCH7	2.83664	7.14354
202589_at	TYMS	2.83169	7.11908
217022_s_at	IGHA1 /// IGHA2 /// LOC100126583	2.81932	7.05829
205156_s_at	ACCN2	2.8177	7.05037
201656_at	ITGA6	2.81526	7.03847
39249_at	AQP3	2.80792	7.00275
221739_at	IL27w	2.80718	6.99914
214516_at	HIST1H4B	2.7956	6.9432
211936_at	HSPA5	2.78862	6.90966
217258_x_at	IGLV1-40 /// IGLV1-44	2.78795	6.90648
220615_s_at	FAR2	2.78744	6.90402
202558_s_at	STCH	2.78596	6.89696
218529_at	8D6A	2.77571	6.84815
211655_at	IGL@	2.76349	6.79037
202671_s_at	PDXK	2.7633	6.78949
216483_s_at	C19orf10	2.76111	6.77915
205903_s_at	KCNN3	2.76049	6.77628
219270_at	CHAC1	2.75767	6.76304
200968_s_at	PPIB	2.74834	6.71943
214455_at	HIST1H2BC	2.74247	6.69215
204695_at	CDC25A	2.74107	6.68566
211881_x_at	IGLJ3	2.73871	6.67474
215946_x_at	IGLL3P	2.72959	6.63269
202503_s_at	KIAA0101	2.72803	6.62549
216573_at	IGLV1-40 /// IGLV1-44	2.71977	6.58767
219978_s_at	ANKT	2.70394	6.51579
214562_at	HIST1H4L	2.68929	6.44994
219066_at	MDS018	2.68207	6.41774
215214_at	IGL@	2.68104	6.4132
217235_x_at	IGLJ3	2.67719	6.39607
202133_at	TAZ	2.66987	6.36373
206150_at	TNFRSF7	2.66589	6.34618
218189_s_at	NANS	2.65847	6.31365
217360_x_at	IGHA1 /// IGHG1 /// IGHG3 /// IGHM /// IGHV4-31 /// LOC100510678	2.65481	6.29763
209610_s_at	SLC1A4	2.65207	6.28569
204740_at	CNK1	2.65136	6.28259
200628_s_at	WARS	2.65078	6.28007
201739_at	SGK	2.64808	6.26835
203418_at	CCNA2	2.64504	6.25514
203747_at	AQP3	2.64401	6.25065
204204_at	SLC31A2	2.63779	6.22377
200985_s_at	CD59	2.63775	6.22362
205945_at	IL6R	2.63389	6.20696
211048_s_at	ERP70	2.62528	6.17003
218542_at	C10orf3	2.61874	6.14215
221879_at	CALML4	2.61505	6.12644
215177_s_at	ITGA6	2.61012	6.10553
208511_at	PTTG3	2.59098	6.02508
216450_x_at	HSP90B1	2.58752	6.01066
58780_s_at	ARHGEF40	2.58658	6.00675
209541_at	IGF1	2.58523	6.00113
220522_at	CRB1	2.58056	5.98174
211649_x_at	IGHA1 /// IGHG1 /// IGHM	2.57506	5.95895
216179_x_at		2.574	5.95457
203764_at	DLG7	2.57312	5.95097
219259_at	SEMA4A	2.57203	5.94647
220448_at	KCNK12	2.57191	5.94598
205141_at	ANG	2.56748	5.92772
204553_x_at	INPP4A	2.56675	5.92473
217384_x_at	IGHV3-48 /// IGKV3-20	2.56342	5.91109
215540_at	TRA@	2.56257	5.90758
209501_at	CDR2	2.5611	5.90159
219555_s_at	BM039	2.55954	5.89521
210046_s_at	IDH2	2.55757	5.88715
218944_at	PYCRL	2.55228	5.86561
64408_s_at	CALML4	2.55115	5.861
209542_x_at	IGF1	2.54193	5.82369
203092_at	TIMM44	2.54044	5.81765
208295_x_at	CSHL1	2.53731	5.80504
217147_s_at	TRIM	2.53491	5.7954
218726_at	HJURP	2.53196	5.78356
216072_at		2.53078	5.77883
216852_x_at	IGLJ3	2.52703	5.76384
206686_at	PDK1	2.5247	5.75452
206873_at	CA6	2.52467	5.75442
204641_at	NEK2	2.50318	5.66935
202557_at	STCH	2.5023	5.66588
214481_at	HIST1H2AM	2.50199	5.66466
217716_s_at	SEC61A1	2.49976	5.6559
214277_at	COX11	2.4975	5.64704
206205_at	MPHOSPH9	2.49351	5.63147
203706_s_at	FZD7	2.47892	5.5748
216517_at	IGKV1D-8	2.47629	5.56465
211643_x_at	IGKC	2.47231	5.5493
214768_x_at	IGKC	2.46244	5.5115
219990_at	E2F8	2.46122	5.50682
209053_s_at	WHSC1	2.46048	5.504
207165_at	HMMR	2.44545	5.44694
204639_at	ADA	2.4372	5.41589
220393_at	LGS	2.43596	5.41124
208495_at	TLX3	2.42837	5.38285
213362_at	PTPRD	2.42609	5.37434
219479_at	KDELC1	2.42378	5.36576
213836_s_at	WIPI1	2.42098	5.35534
219042_at	LZTS1	2.41908	5.34831
208396_s_at	PDE1A	2.41872	5.34698
200700_s_at	KDELR2	2.41411	5.32989
212020_s_at	MKI67	2.41394	5.32927
216636_at		2.41208	5.32241
209690_s_at	DOK4	2.41111	5.31882
204825_at	MELK	2.40662	5.30231
217790_s_at	SSR3	2.4003	5.27914
206243_at	TIMP4	2.38171	5.21152
200889_s_at	SSR1	2.37579	5.19019
220565_at	GPR2	2.37499	5.18732
214916_x_at	IGHM	2.37439	5.18518
200929_at	TMP21	2.3591	5.13051
210055_at	TSHR	2.35515	5.11648
200654_at	P4HB	2.34673	5.0867
202338_at	TK1	2.34568	5.08299
216576_x_at	IGK@ /// IGKC /// LOC652493 /// LOC652694	2.34078	5.06575
201021_s_at	DSTN	2.33867	5.05838
202283_at	SERPINF1	2.33414	5.0425
208906_at	BSCL2	2.32985	5.02753
217744_s_at	PIGPC1	2.32688	5.01719
207242_s_at	GRIK1	2.32551	5.01242
215561_s_at	IL1R1	2.32229	5.00127
202175_at	CHPF	2.31458	4.97459
216562_at		2.31305	4.96933
215672_s_at	AHCYL2	2.31224	4.96652
218358_at	CRELD2	2.30939	4.95672
200967_at	PPIB	2.30726	4.94941
201387_s_at	UCHL1	2.30603	4.94519
202705_at	CCNB2	2.29556	4.90945
216541_x_at	IGHG1 /// IGHM /// LOC100133862	2.29131	4.89501
209325_s_at	RGS16	2.28985	4.89006
211640_x_at	IGHG3	2.2883	4.8848
221921_s_at	NECL1	2.28821	4.88451
206797_at	NAT2	2.26856	4.81843
216986_s_at	IRF4	2.26796	4.81643
208293_x_at	CSHL1	2.26504	4.80669
220495_s_at	TXNDC15	2.26327	4.80078
216609_at	TXN	2.25945	4.78808
200643_at	HDLBP	2.25643	4.77809
219776_s_at		2.25288	4.76634
222268_x_at	MUC5B	2.25223	4.7642
220094_s_at	CCDC90A	2.24465	4.73924
203097_s_at	PDZ-GEF1	2.24326	4.73465
202763_at	CASP3	2.23861	4.71943
217198_x_at	IGHA2 /// IGHD /// IGHG1 /// LOC100126583 /// LOC100510361	2.23317	4.70166
203725_at	GADD45A	2.23051	4.69299
209030_s_at	IGSF4	2.22926	4.68893
217480_x_at	IGKC	2.22722	4.68232
221436_s_at	GRCC8	2.22475	4.67429
204400_at	EFS	2.22048	4.66048
207112_s_at	GAB1	2.21778	4.65179
209573_s_at	C18orf1	2.21632	4.64707
206660_at	IGLL1	2.21498	4.64274
202393_s_at	TIEG	2.21069	4.62895
208864_s_at	TXN	2.20939	4.62479
200825_s_at	HYOU1	2.20773	4.61949
202064_s_at	SEL1L	2.20555	4.61251
220651_s_at	MCM10	2.20373	4.60669
212811_x_at	SLC1A4	2.20154	4.59971
200890_s_at	SSR1	2.19301	4.57259
206894_at	APOA4	2.18753	4.55526
205768_s_at	SLC27A2	2.18544	4.54867
202468_s_at	CTNNAL1	2.18351	4.54256
204026_s_at	ZWINT	2.18331	4.54194
218875_s_at	FBXO5	2.18092	4.53443
217622_at		2.1809	4.53436
218035_s_at	RBM47	2.17933	4.52943
205712_at	PTPRD	2.17843	4.5266
203794_at	CDC42BPA	2.16593	4.48756
201995_at	EXT1	2.16439	4.48277
215965_at		2.16204	4.47546
203234_at	UP	2.15961	4.46795
203711_s_at	HIBCH	2.15933	4.46707
213355_at	ST3GALVI	2.1591	4.46637
206424_at	CYP26A1	2.15627	4.45762
210542_s_at	SLC21A11	2.1536	4.44936
210657_s_at	PNUTL2	2.14823	4.43283
210534_s_at	EPPB9	2.14676	4.42833
221297_at	GPRC5D	2.14326	4.41758
209680_s_at	KIFC1	2.13373	4.3885
214845_s_at	CALU	2.13	4.37717
209825_s_at	UMPK	2.12964	4.37609
218333_at	F-LAN-1	2.12882	4.37359
204965_at	GC	2.12581	4.36447
203755_at	BUB1B	2.12499	4.36199
213820_s_at	STARD5	2.12373	4.3582
203554_x_at	PTTG1	2.12352	4.35757
207363_at	RS1	2.11241	4.32414
219885_at	SLFN12	2.11176	4.32217
211644_x_at	IGKC	2.10504	4.30211
218409_s_at	DNAJC1	2.10372	4.29815
202369_s_at	TRAM2	2.10253	4.2946
213830_at	TRD@	2.10116	4.29054
208524_at	GPR15	2.0965	4.27669
209324_s_at	RGS16	2.09607	4.27543
220892_s_at	PSA	2.08784	4.25111
215805_at		2.08648	4.24711
65086_at	YIPF2	2.08572	4.24486
221767_x_at	HDLBP	2.08119	4.23156
211313_s_at	BAZ1B	2.08088	4.23066
216984_x_at	IGLJ3	2.07988	4.22771
218193_s_at	CGI-141	2.07892	4.2249
214630_at	CYP11B2	2.07872	4.22433
209879_at	SELPLG	2.07693	4.21908
217787_s_at	GALNT2	2.07621	4.21699
201004_at	SSR4	2.0759	4.21608
211817_s_at	KCNJ5	2.0737	4.20966
205470_s_at	KLK11	2.07067	4.20082
203294_s_at	LMAN1	2.06937	4.19703
219650_at	ERCC6L	2.06836	4.19409
219254_at	C17orf101	2.06608	4.18747
203640_at	PRO2032	2.06533	4.1853
209880_s_at	SELPLG	2.0652	4.18491
219886_at	CEP97	2.06364	4.18039
201821_s_at	TIMM17A	2.05441	4.15374
215976_at		2.05265	4.14868
208363_s_at	INPP4A	2.05232	4.14773
216275_at	BUB1	2.04921	4.13879
219402_s_at	DERL1	2.04637	4.13064
209939_x_at	CFLAR	2.04276	4.12034
219920_s_at	GMPPB	2.04254	4.1197
216343_at	PCDHGA3	2.04108	4.11554
201287_s_at	SDC1	2.04065	4.1143
201714_at	TUBG1	2.0363	4.10193
202094_at	BIRC5	2.03289	4.09223
206963_s_at	CML2	2.02528	4.07071
220926_s_at	C1orf22	2.02499	4.0699
222288_at		2.02251	4.06291
207038_at	SLC16A6	2.0217	4.06062
207450_s_at	RPF-1	2.02011	4.05615
219283_at	C1GALT2	2.01918	4.05353
202433_at	UGTREL1	2.01355	4.03775
203295_s_at	ATP1A2	2.0111	4.03089
216519_s_at	PROSC	2.01083	4.03014
213129_s_at	GCSH /// LOC100329108	2.00745	4.02071
211632_at	IGHD /// IGHG1 /// IGHM	2.00625	4.01736
200984_s_at	CD59	2.00534	4.01485
214819_at	IQSEC2	2.00157	4.00435
203002_at	AMOTL2	1.99266	3.97971
209714_s_at	CDKN3	1.99179	3.97731
215842_s_at	ATP11A	1.98588	3.96103
201349_at	SLC9A3R1	1.98202	3.95047
204092_s_at	STK6	1.98098	3.94761
204426_at	RNP24	1.98019	3.94546
218817_at	SPCS3	1.97769	3.93863
213796_at	SPRR1A	1.97699	3.93671
212900_at	SEC24A	1.97622	3.93461
210563_x_at	CFLAR	1.96961	3.91662
208674_x_at	DDOST	1.96948	3.91627
217236_x_at	IGHM	1.9678	3.91172
221992_at	LOC100507666 /// NPIPL2	1.96718	3.91004
211557_x_at	SLC21A9	1.96649	3.90817
208215_x_at	DRD4	1.9627	3.89792
204790_at	MADH7	1.96034	3.89155
205580_s_at	HRH1	1.95961	3.88956
216378_at		1.95658	3.8814
201096_s_at	ARF4	1.95507	3.87735
209186_at	ATP2A2	1.95476	3.87651
218801_at	UGCGL2	1.95197	3.86903
219989_s_at	EB-1	1.94376	3.84707
212868_x_at	MAPKAPK5	1.94199	3.84235
204922_at	C11orf80	1.94146	3.84095
217678_at	SLC7A11	1.94022	3.83765
214157_at	GNAS	1.93827	3.83246
206366_x_at	XCL1	1.92403	3.79482
218927_s_at	C4S-2	1.91979	3.78367
211303_x_at	PSMAL/GCP II	1.91968	3.78338
215438_x_at	GSPT1	1.91867	3.78073
215594_at		1.91696	3.77627
204998_s_at	ATF5	1.91397	3.76845
211645_x_at	IGKC	1.91309	3.76615
204255_s_at	VDR	1.91105	3.76082
220751_s_at	C5orf4	1.90954	3.7569
222015_at	CSNK1E	1.8991	3.7298
203474_at	IQGAP2	1.89318	3.71452
218695_at	EXOSC4	1.89074	3.70825
218350_s_at	GMNN	1.88845	3.70236
209062_x_at	NCOA3	1.88764	3.7003
208658_at	ERP70	1.88381	3.69049
213555_at	RWDD2A	1.88293	3.68822
209863_s_at	TP73L	1.87796	3.67556
201011_at	RPN1	1.87044	3.65645
205434_s_at	AAK1	1.86887	3.65246
210243_s_at	B4GALT3	1.86873	3.6521
201516_at	SRM	1.86475	3.64204
214874_at	PKP4	1.86015	3.63046
221597_s_at	HSPC171	1.857	3.62254
210387_at	HIST1H2BG	1.85546	3.61867
219429_at	FAAH	1.85309	3.61274
212021_s_at	MKI67	1.85241	3.61104
210951_x_at	RAB27A	1.85126	3.60814
204159_at	CDKN2C	1.84649	3.59625
214472_at	HIST1H3D	1.84287	3.58723
219696_at	DENND1B	1.84276	3.58695
206083_at	BAI1	1.84074	3.58195
209975_at	CYP2E1	1.84057	3.58151
218774_at	DCPS	1.83589	3.56992
207355_at	SLC1A7	1.83272	3.56208
217163_at	ESR1	1.8327	3.56203
202148_s_at	PYCR1	1.82398	3.54056
211242_x_at	KIR2DL4	1.81934	3.5292
203484_at	SEC61G	1.81251	3.51254
218018_at	C21orf97	1.80877	3.50343
209933_s_at	CMRF-35H	1.8076	3.50059
219107_at	BCAN	1.80699	3.49911
202345_s_at	FABP5	1.79845	3.47846
212810_s_at	SLC1A4	1.79707	3.47513
214514_at	MCM3AP	1.79102	3.4606
205018_s_at	MBNL2	1.78787	3.45304
214870_x_at	NPIP	1.78304	3.4415
208602_x_at	CD6	1.7824	3.43999
204427_s_at	RNP24	1.78058	3.43564
215779_s_at	HIST1H2BG	1.77681	3.42668
201399_s_at	TRAM	1.76679	3.40296
209149_s_at	TM9SF1	1.76453	3.39764
202236_s_at	SLC16A1	1.76407	3.39654
219911_s_at	SLC21A12	1.76373	3.39575
218721_s_at	C1orf27	1.76167	3.39091
201568_at	QP-C	1.76161	3.39076
204130_at	HSD11B2	1.75496	3.37517
200757_s_at	CALU	1.75482	3.37483
218585_s_at	RAMP	1.75475	3.37467
203360_s_at	MYCBP	1.7501	3.36381
202195_s_at	CGI-100	1.74933	3.36201
214710_s_at	CCNB1	1.74811	3.35918
201397_at	PHGDH	1.74695	3.35649
207668_x_at	P5	1.74639	3.35519
214035_x_at	NPIP	1.74286	3.34699
203133_at	SEC61B	1.7387	3.33734
201543_s_at	SAR1	1.73062	3.3187
217148_x_at	IGLJ3	1.7227	3.30055
218213_s_at	C11orf10	1.71731	3.28822
218203_at	ALG5	1.71258	3.27747
203921_at	CHST2	1.71094	3.27375
200656_s_at	P4HB	1.70692	3.26462
218039_at	ANKT	1.7016	3.25261
202082_s_at	SEC14L1	1.70036	3.24981
208639_x_at	P5	1.69907	3.24692
204033_at	TRIP13	1.69658	3.24131
221369_at	MTNR1A	1.69354	3.2345
207734_at	LAX	1.6921	3.23126
202223_at	ITM1	1.69158	3.23011
213374_x_at	HIBCH	1.68871	3.22368
202084_s_at	SEC14L1	1.68688	3.2196
211061_s_at	MGAT2	1.68325	3.2115
211233_x_at	ESR1	1.67963	3.20345
213540_at	HSD17B8	1.67722	3.19811
201532_at	PSMA3	1.67575	3.19485
221501_x_at	NPIP	1.67346	3.18978
208689_s_at	RPN2	1.67269	3.18808
203102_s_at	MGAT2	1.66932	3.18065
200803_s_at	TEGT	1.66517	3.17151
204538_x_at	NPIP	1.65855	3.15699
218324_s_at	SPATS2	1.65024	3.13887
204552_at	INPP4A	1.64961	3.13749
216640_s_at	PDIA6	1.64335	3.12391
218070_s_at	GMPPA	1.64231	3.12166
205159_at	CSF2RB	1.64047	3.11768
204785_x_at	IFNAR2	1.64014	3.11696
210293_s_at	SEC23B	1.6378	3.11191
207563_s_at	OGT	1.63751	3.11127
209777_s_at	SLC19A1	1.63642	3.10894
205812_s_at	SULT1C2	1.6358	3.1076
201239_s_at	SPCS2	1.62795	3.09073
214836_x_at	IGKC	1.6227	3.0795
203967_at	CDC6	1.61848	3.07051
39763_at	HPX	1.61521	3.06355
214512_s_at	PC4	1.61228	3.05734
221551_x_at	SIAT7D	1.61162	3.05595
204767_s_at	FEN1	1.61111	3.05487
213502_x_at	LOC91316	1.60858	3.04952
205394_at	CHEK1	1.60629	3.04468
208638_at	P5	1.60298	3.03771
222231_s_at	PRO1855	1.59573	3.02246
218883_s_at	MLF1IP	1.59566	3.02232
217848_s_at	PP	1.59295	3.01666
213491_x_at	RPN2	1.59039	3.0113
200805_at	C5orf8	1.58775	3.00581
218678_at	NES	1.58255	2.99499
203199_s_at	MTRR	1.58148	2.99278
203201_at	PMM2	1.57976	2.9892
214337_at	COPA	1.57951	2.98868
219374_s_at	DIBD1	1.57825	2.98607
205034_at	CCNE2	1.57805	2.98566
201098_at	COPB2	1.56908	2.96715
37079_at	YDD19	1.56576	2.96033
38158_at	ESPL1	1.5592	2.9469
217927_at	SPC12	1.55468	2.93769
204175_at	ZNF593	1.5504	2.92898
216401_x_at		1.55	2.92817
210385_s_at	ARTS-1	1.54968	2.92753
205436_s_at	H2AFX	1.5391	2.90613
222316_at		1.51809	2.86412
217390_x_at		1.51657	2.8611
201955_at	CCNC	1.51502	2.85803
217871_s_at	MIF	1.51074	2.84955
203374_s_at	TPP2	1.50447	2.83721
220937_s_at	SIAT7D	1.50373	2.83575
213399_x_at	RPN2	1.50049	2.82939
200698_at	KDELR2	1.49615	2.8209
208675_s_at	DDOST	1.49342	2.81555
202954_at	UBE2C	1.48511	2.79939
217850_at	NS	1.47919	2.78792
217933_s_at	LAP3	1.46685	2.76417
202857_at	TMEM4	1.4577	2.7467
201577_at	NME1	1.45568	2.74286
207707_s_at	SEC13L1	1.45033	2.73271
209129_at	TRIP6	1.44937	2.73088
201022_s_at	DSTN	1.43907	2.71145
208926_at	NEU1	1.43443	2.70275
222132_s_at	AGK	1.42953	2.6936
216207_x_at	IGKV1D-13	1.42531	2.68572
208336_s_at	GPSN2	1.41651	2.6694
201597_at	COX7A2	1.41407	2.66488
203988_s_at	FUT8	1.40676	2.65142
221923_s_at	NPM1	1.40083	2.64053
218282_at	C20orf31	1.39379	2.62768
204079_at	TPST2	1.37979	2.6023
218357_s_at	TIMM8B	1.37487	2.59345
201068_s_at	PSMC2	1.37459	2.59295
212685_s_at	TBL2	1.37378	2.59148
205698_s_at	MAP2K6	1.37375	2.59144
201769_at	ENTH	1.36926	2.58338
200935_at	CALR	1.36327	2.57267
208693_s_at	GARS	1.34684	2.54355
201659_s_at	ARL1	1.34381	2.53821
203647_s_at	FDX1	1.34282	2.53646
201097_s_at	ARF4	1.33999	2.53149
217861_s_at	PREB	1.33427	2.52147
214086_s_at	ADPRTL2	1.27757	2.42429
221844_x_at	SPCS3	1.2735	2.41748
212866_at	R3HCC1	1.27262	2.41599
203613_s_at	NDUFB6	1.26989	2.41142
205335_s_at	SRP19	1.24146	2.36437
201994_at	MORF4L2	1.22673	2.34035
221932_s_at	C14orf87	1.21601	2.32304
218339_at	MRPL22	1.19995	2.29732
203567_s_at	TRIM38	-1.63832	3.11303
202113_s_at	SNX2	-1.64077	3.11832
206687_s_at	PTPN6	-1.65317	3.14523
221044_s_at	TRIM34	-1.65661	3.15274
209285_s_at	RAP140	-1.66421	3.16939
219032_x_at	OPN3	-1.67214	3.18687
201978_s_at	KIAA0141	-1.68698	3.21981
210448_s_at	P2RX5	-1.69025	3.22713
204960_at	PTPRCAP	-1.6959	3.23979
217478_s_at	HLA-DMA	-1.71235	3.27695
215193_x_at	HLA-DRB1	-1.72418	3.30392
201847_at	LIPA	-1.74773	3.35831
201720_s_at	LAPTM5	-1.77501	3.4224
219667_s_at	BANK	-1.77646	3.42584
204670_x_at	HLA-DRB3	-1.78561	3.44764
202501_at	MAPRE2	-1.79225	3.46355
209306_s_at	SWAP70	-1.79317	3.46575
201700_at	CCND3	-1.79717	3.47537
208944_at	TGFBR2	-1.83948	3.57881
219546_at	BIKE	-1.8396	3.5791
221969_at	PAX5	-1.85848	3.62625
201331_s_at	STAT6	-1.86898	3.65275
59644_at	BIKE	-1.87411	3.66575
214272_at	CYLD	-1.88446	3.69215
202732_at	PKIG	-1.89151	3.71025
200934_at	DEK	-1.89642	3.72289
203683_s_at	VEGFB	-1.89911	3.72983
203518_at	CHS1	-1.91195	3.76318
202114_at	SNX2	-1.93181	3.81533
212561_at	RAB6IP1	-1.9352	3.8243
202080_s_at	OIP106	-1.93523	3.82439
213142_x_at	PION	-1.93715	3.82948
212632_at	STX7	-1.9612	3.89387
203879_at	PIK3CD	-1.96527	3.90485
219165_at	PDLIM2	-1.97082	3.91991
204192_at	CD37	-1.97821	3.94003
221645_s_at	ZNF83	-1.98377	3.95525
214933_at	CACNA1A	-1.98414	3.95627
200972_at	TSPAN-3	-1.99651	3.99034
211991_s_at	HLA-DPA1	-2.00864	4.02402
213772_s_at	GGA2	-2.00907	4.02524
206398_s_at	CD19	-2.01773	4.04946
221601_s_at	TOSO	-2.01802	4.05027
209650_s_at	C22orf4	-2.03263	4.0915
203037_s_at	MIM	-2.03805	4.10689
211067_s_at	GAS7	-2.0456	4.12845
201259_s_at	SYPL	-2.05463	4.15437
212914_at	CBX7	-2.05875	4.16625
218032_at	SNN	-2.07084	4.2013
207511_s_at	CGI-57	-2.0731	4.2079
202651_at	LPGAT1	-2.07943	4.22641
218149_s_at	ZNF395	-2.08062	4.22989
203111_s_at	PTK2B	-2.10882	4.31338
212631_at	STX7	-2.10907	4.31413
203932_at	HLA-DMB	-2.12456	4.3607
201260_s_at	SYPL	-2.1315	4.38173
214879_x_at	USF2	-2.13364	4.38822
210336_x_at	ZNF42	-2.13698	4.39839
205789_at	CD1D	-2.14027	4.40844
210044_s_at	LYL1	-2.14235	4.41482
212895_s_at	ABR	-2.14801	4.43215
205101_at	MHC2TA	-2.14802	4.4322
200965_s_at	ABLIM1	-2.15093	4.44114
209307_at	SWAP70	-2.15613	4.45718
210356_x_at	MS4A1	-2.17245	4.50789
208880_s_at	C20orf14	-2.18436	4.54525
221581_s_at	WBSCR5	-2.19115	4.56668
204861_s_at	BIRC1	-2.19476	4.57815
209131_s_at	SNAP23	-2.1958	4.58145
205861_at	SPIB	-2.20979	4.62609
213364_s_at	SNX1	-2.21858	4.65436
202124_s_at	ALS2CR3	-2.22226	4.66623
201869_s_at	TBL1X	-2.22989	4.691
213111_at	PIKFYVE	-2.23328	4.70203
203521_s_at	ZFP318	-2.23342	4.70247
214717_at	PK155	-2.24413	4.73751
205451_at	MLLT7	-2.24685	4.74644
215837_x_at	PRO1621	-2.26708	4.81348
213457_at	MFHAS1	-2.28135	4.86133
201961_s_at	SBB103	-2.29108	4.89424
209256_s_at	KLHDC10	-2.2943	4.90518
206497_at	C7orf44	-2.29482	4.90693
217418_x_at	MS4A1	-2.30536	4.94289
218274_s_at	ANKZF1	-2.31048	4.9605
56256_at	CGI-40	-2.31757	4.98491
211031_s_at	CYLN2	-2.3197	4.99228
210829_s_at	SSBP2	-2.34097	5.06642
203063_at	PPM1F	-2.34667	5.08647
205671_s_at	HLA-DOB	-2.35418	5.11304
202916_s_at	FAM20B	-2.36764	5.16095
202796_at	SYNPO	-2.37025	5.17031
205468_s_at	IRF5	-2.37688	5.19413
218639_s_at	ZXDC	-2.37843	5.19971
212845_at	SAMD4A	-2.38994	5.24137
205307_s_at	KMO	-2.39414	5.25663
204174_at	ALOX5AP	-2.39566	5.26218
218986_s_at	DDX60	-2.41088	5.31799
212774_at	ZNF238	-2.41383	5.32888
212998_x_at	HLA-DQB1	-2.41417	5.33013
212496_s_at	KDM4B	-2.41729	5.34166
204411_at	KIF21B	-2.42354	5.36484
206255_at	BLK	-2.43147	5.39444
203723_at	ITPKB	-2.43223	5.39728
210202_s_at	BIN1	-2.4356	5.40988
204057_at	ICSBP1	-2.43758	5.41732
210763_x_at	NCR3	-2.44395	5.44131
221602_s_at	TOSO	-2.45357	5.4777
210057_at	SMG1	-2.45734	5.49203
219574_at	MAR1	-2.48317	5.59125
218223_s_at	CKIP-1	-2.48423	5.59534
210770_s_at	CACNA1A	-2.49138	5.62315
204689_at	HHEX	-2.49564	5.63979
221011_s_at	LBH	-2.51754	5.72606
202152_x_at	USF2	-2.51982	5.73512
215933_s_at	HHEX	-2.52403	5.75189
212855_at	DCUN1D4	-2.53124	5.78068
219364_at	LGP2	-2.54113	5.82043
60471_at	RIN3	-2.54743	5.8459
218338_at	PHC1	-2.54956	5.85456
208071_s_at	LAIR1	-2.55157	5.86274
211583_x_at	NCR3	-2.55183	5.86379
212510_at	GPD1L	-2.5819	5.98729
210756_s_at	NOTCH2	-2.58191	5.98731
219261_at	C7orf26	-2.59994	6.06262
206983_at	CCR6	-2.60325	6.07653
200973_s_at	TSPAN-3	-2.60817	6.09732
220324_at	C6orf155	-2.61944	6.14509
221766_s_at	C6orf37	-2.64608	6.25965
218029_at	FAM65A	-2.66025	6.32141
207164_s_at	ZNF238	-2.66335	6.33503
211656_x_at	HLA-DQB1	-2.6683	6.3568
207826_s_at	ID3	-2.66961	6.36258
216033_s_at	FYN	-2.67618	6.3916
219104_at	ZFP26	-2.68393	6.42602
210992_x_at	FCGR2A	-2.68587	6.43471
212609_s_at	AKT3	-2.71921	6.58514
203331_s_at	INPP5D	-2.71989	6.58821
211010_s_at	NCR3	-2.72828	6.62667
202254_at	SIPA1L1	-2.7371	6.66731
219460_s_at	TMEM127	-2.74368	6.69774
219024_at	PLEKHA1	-2.74706	6.71347
203939_at	NT5E	-2.76569	6.80073
218076_s_at	RICH1	-2.76872	6.81502
214722_at	NOTCH2NL	-2.79784	6.95397
219497_s_at	BCL11A	-2.80714	6.99897
218922_s_at	LASS4	-2.81008	7.01323
203543_s_at	BTEB1	-2.81176	7.0214
209370_s_at	SH3BP2	-2.81773	7.05052
207266_x_at	RBMS1	-2.83704	7.14553
205928_at	ZK1	-2.84238	7.17201
205148_s_at	CLCN4	-2.84414	7.1808
219457_s_at	RIN3	-2.84881	7.20406
221725_at	WASF2	-2.85528	7.23643
201674_s_at	AKAP1	-2.86765	7.29874
221064_s_at	UNKL	-2.87416	7.33174
205505_at	GCNT1	-2.9083	7.50735
204046_at	PLCB2	-2.91458	7.5401
204959_at	MNDA	-2.92531	7.59637
203603_s_at	ZFHX1B	-2.9616	7.78988
203271_s_at	UNC119	-2.96196	7.7918
217789_at	SNX6	-2.97631	7.86971
202971_s_at	DYRK2	-2.98087	7.89463
208018_s_at	HCK	-2.9816	7.89861
208206_s_at	RASGRP2	-2.99429	7.96839
209558_s_at	HIP1R	-3.01185	8.066
214950_at		-3.02233	8.12479
212746_s_at	CEP170	-3.02568	8.1437
209823_x_at	HLA-DQB1	-3.04311	8.24267
213174_at	TTC9	-3.06166	8.34932
202996_at	POLD4	-3.06376	8.36151
216915_s_at	PTPN12	-3.06477	8.36736
38521_at	CD22	-3.08446	8.48232
208454_s_at	PGCP	-3.13966	8.81314
212068_s_at	BAT2L1	-3.14905	8.87069
210113_s_at	DEFCAP	-3.19689	9.1698
219171_s_at	ZNF236	-3.21217	9.26747
218806_s_at	VAV3	-3.27829	9.70202
200702_s_at	DDX24	-3.29026	9.7829
203520_s_at	ZFP318	-3.29452	9.81182
206620_at	GRAP	-3.30741	9.89986
217422_s_at	CD22	-3.31314	9.93926
217560_at	GGA1	-3.34758	10.1794
205987_at	CD1C	-3.36704	10.3176
219049_at	ChGn	-3.37328	10.3623
208438_s_at	FGR	-3.38997	10.4829
218312_s_at	ZSCAN18	-3.39676	10.5324
219737_s_at	PCDH9	-3.40586	10.5991
205611_at	TNFSF12	-3.41636	10.6764
221728_x_at	XIST	-3.43969	10.8505
209700_x_at	PDE4DIP	-3.44093	10.8599
205379_at	CBR3	-3.47876	11.1484
205466_s_at	HS3ST1	-3.51746	11.4514
219014_at	PLAC8	-3.53057	11.556
214218_s_at	XIST	-3.55426	11.7473
210279_at	GPR18	-3.55616	11.7628
203490_at	ELF4	-3.55777	11.776
214475_x_at	CAPN3	-3.57702	11.9341
217818_s_at	ARPC4	-3.58085	11.9659
219593_at	PHT2	-3.69644	12.9641
210314_x_at	TNFSF13	-3.85838	14.5041
214954_at	SUSD5	-3.9937	15.9303
203865_s_at	ADARB1	-4.13557	17.5765
213400_s_at	TBL1X	-4.17738	18.0932
217865_at	GP	-4.17912	18.1151
204995_at	CDK5R1	-4.42646	21.5029
204581_at	CD22	-4.54035	23.2692
219452_at	DPEP2	-4.62204	24.6249
215925_s_at	CD72	-4.88883	29.6267
208820_at	PTK2	-5.06122	33.3872
